# Supplementary material
Source: publisher figshare collection journal article supplement (https://acs.figshare.com/ndownloader/files/4575106)
Supplement: Supplementary file 1 [file 4575106]

## Supporting Information

### EPR Spectroscopy of Bis(triarylamine) Paracyclophanes as Model Compounds for the Intermolecular Charge-Transfer in Solid State Materials for Optoelectronic Applications

By Daniel R. Kattnig, Boryana Mladenova, Günter Grampp,<sup>\*</sup> Conrad Kaiser, Alexander Heckmann, and Christoph Lambert<sup>\*</sup>

**Table S1.** Redox potentials and structural characteristics of compounds **I-IX**.  $E_{1/2}$  are the half-wave potentials measured by cyclic voltammetry in  $\text{CH}_2\text{Cl}_2$  vs. ferrocene/ferrocenium (0.15 M tetrabutylammonium hexafluorophosphate); error  $\pm 5$  mV.  $r_{\text{N-N}}$  is the nitrogen-nitrogen distance determined by AM1 computations and the minimal number of bonds interconnecting the centres is reported. The redox properties have been taken from the quoted literature.

| Compound    | $r_{\text{N-N}} / \text{\AA}$ | no. bonds | $E_{1/2}(\text{I}) / \text{mV}$ | $E_{1/2}(\text{II}) / \text{mV}$ | $\Delta E / \text{mV}$ | Lit.         |
|-------------|-------------------------------|-----------|---------------------------------|----------------------------------|------------------------|--------------|
| <b>I</b>    | 15                            | 16        | 200                             | 250                              | 50                     | <sup>1</sup> |
| <b>II</b>   | 19.9                          | 20        | 240                             | 290                              | 50                     | <sup>1</sup> |
| <b>III</b>  | 25                            | 24        | 290                             | 340                              | 50                     | <sup>1</sup> |
| <b>IV</b>   | 19.9                          | 21        | 240                             | 280                              | 40                     | this work    |
| <b>V</b>    | 19.3                          | 17        | 270                             | 320                              | 50                     | <sup>1</sup> |
| <b>VI</b>   | 19.3                          | 17        | 275                             | 335                              | 60                     | <sup>2</sup> |
| <b>VII</b>  | 28.7                          | 25        | 330                             | 385                              | 55                     | <sup>3</sup> |
| <b>VIII</b> |                               |           | 290                             |                                  |                        | this work    |
| <b>IX</b>   |                               |           | 270                             |                                  |                        | <sup>1</sup> |

#### Optical Characterization of **II**<sup>+</sup> and **IV**<sup>+</sup>

The data of **II**<sup>+</sup> deviate from those in ref.<sup>1</sup> because the reduced ( $\epsilon/\nu$ ) absorption spectrum was used for the analysis in this paper. Data evaluation, AM1 computations and notation follows those in ref.<sup>1</sup>.

**Table S2.** Experimental data obtained from Vis/NIR spectra recorded in CH<sub>2</sub>Cl<sub>2</sub> and spectra decomposition by Gaussian functions.

|                 | $\tilde{\nu}_a^a$<br>/ cm <sup>-1</sup> | $\Delta\tilde{\nu}_{1/2}^b$<br>/ cm <sup>-1</sup> | $\epsilon^c$<br>/ M <sup>-1</sup><br>cm <sup>-1</sup> | $\mu_{ga}$<br>/ D | $\tilde{\nu}_b^a$<br>/ cm <sup>-1</sup> | $\Delta\tilde{\nu}_{1/2}^b$<br>/ cm <sup>-1</sup> | $\epsilon^c$<br>/ M <sup>-1</sup><br>cm <sup>-1</sup> | $\mu_{gb}$<br>/ D | $\tilde{\nu}_{\pi-\pi^*}^a$<br>/ cm <sup>-1</sup> | $\epsilon^c$<br>/ cm <sup>-1</sup> |
|-----------------|-----------------------------------------|---------------------------------------------------|-------------------------------------------------------|-------------------|-----------------------------------------|---------------------------------------------------|-------------------------------------------------------|-------------------|---------------------------------------------------|------------------------------------|
| II <sup>+</sup> | 5870                                    | 4820                                              | 1700                                                  | 3.5±0.2           | 10730                                   | 2280                                              | 18300                                                 | 6.2±0.3           | 13460                                             | 28700                              |
| IV <sup>+</sup> | 8500                                    | 5550                                              | 860                                                   | 2.3               | 10610                                   | 2600                                              | 13820                                                 | 5.8               | 13500                                             | 23720                              |

<sup>a</sup> ±200 cm<sup>-1</sup>. <sup>b</sup> ±200 cm<sup>-1</sup>. <sup>c</sup> ±5%.

**All semiempirical calculations** were done using the AM1 parameterization implemented in the MOPAC97 program.<sup>4</sup> All optimization were performed without symmetry restrictions in Cartesian coordinates by the eigenvector following (EF) routine. The configuration interaction included singles and doubles excitations (CISD) within an active orbital window consisting of the four highest doubly occupied, one singly occupied and the two lowest unoccupied orbitals. *Pulay's* procedure was used as the self consistent field (SCF) converger of all calculations. The effect of the solvent (CH<sub>2</sub>Cl<sub>2</sub>) was simulated using the conductor-like screening model (COSMO) including the parameters  $\epsilon = 2.0$  and a radius of the solvent of 2.5 Å at the CISD optimized gas phase structures. The experimental permittivity of CH<sub>2</sub>Cl<sub>2</sub> is 8.9 but a previous study revealed that a smaller empirical permittivity yields more reliable results.

**Table S3.** AM1-CISD and AM1-CISD+COSMO ( $\epsilon = 2$ ) computed and experimental adiabatic dipole moment differences and transition moments and diabatic dipole moment differences calculated by GMH three-state model in D.

|            |                       | $\mu_{gg}-\mu_{gg}$ | $\mu_{aa}-\mu_{gg}$ | $\mu_{bb}-\mu_{gg}$ | $\mu_{ga}$ | $\mu_{gb}$ | $\mu_{ab}$ | $\mu_{11}-\mu_{11}$ | $\mu_{22}-\mu_{11}$ | $\mu_{33}-\mu_{11}$ |
|------------|-----------------------|---------------------|---------------------|---------------------|------------|------------|------------|---------------------|---------------------|---------------------|
| <b>II+</b> | AM1-CISD <sup>a</sup> | 0                   | 69.2                | 21.2                | 22.2       | 6.3        | 12.7       | 0                   | 85.8                | 24.8                |
|            | + COSMO <sup>a</sup>  | 0                   | 66.0                | 30.8                | 6.5        | 8.9        | 7.1        | 0                   | 71.1                | 33.8                |
|            | exp. <sup>a, c</sup>  | -                   | -                   | -                   | 3.5        | 6.2        | -          | 0                   | 69.0                | 31.7                |
| <b>IV+</b> | AM1-CISD <sup>b</sup> | 0                   | 70.7                | 36.7                | 27.6       | 4.4        | 12.3       | 0                   | 93.4                | 46.7                |
|            | + COSMO <sup>b</sup>  | 0                   | 61.0                | 43.5                | 3.9        | 6.8        | 8.4        | 0                   | 65.9                | 43.2                |
|            | exp. <sup>b, c</sup>  | -                   | -                   | -                   | 2.3        | 5.8        | -          | 0                   | 65.3                | 42.0                |

<sup>a</sup> Odd number of positive off-diagonal transition moments. <sup>b</sup> Even number of positive off-diagonal transition moments <sup>c</sup> For the three-level GMH analysis the experimental values and, where lacking, the COSMO ( $\epsilon = 2.0$ ) values were used.

**Table S4.** Transition energies (AM1-CISD and AM1-CISD+COSMO computed and experimental) and diabatic electronic couplings (GMH) in  $\text{cm}^{-1}$ . We stress that in case of **IV+** the electronic couplings are highly sensitive to the choice of transition energies because of the close proximity of IV-CT and bridge band energies.

|            |                       | $\tilde{\nu}_a$ | $\tilde{\nu}_b$ | $V_{12}^a$ | $V_{13}^a$ | $V_{23}^a$ | $V_{\text{two-state}}^b$ |
|------------|-----------------------|-----------------|-----------------|------------|------------|------------|--------------------------|
| <b>II+</b> | AM1-CISD <sup>d</sup> | 8640            | 11310           | 2380       | 480        | 540        | 2330                     |
|            | + COSMO <sup>d</sup>  | 10030           | 13060           | 1320       | 2850       | 340        | 970                      |
|            | exp. <sup>d, f</sup>  | 5870            | 10730           | 580        | 1850       | 860        | 310                      |
| <b>IV+</b> | AM1-CISD <sup>c</sup> | 9060            | 12490           | 2370       | 2540       | 1360       | 2790                     |
|            | + COSMO <sup>d</sup>  | 12660           | 11790           | 270        | 2150       | 250        | 800                      |
|            | exp. <sup>d, e</sup>  | 8500            | 10610           | 110        | 1530       | 720        | 320                      |

<sup>a</sup> Obtained by the GMH three-state model. <sup>b</sup> Obtained by the GMH two-state model. <sup>c</sup> Even number of positive coupling values. <sup>d</sup> Odd number of positive coupling values. <sup>e</sup> For the three-level GMH analysis the experimental values and, where lacking, the COSMO (in the solvent) values were used.

The three-state-GMH-PES fit yields the following parameters for  $\text{II}^+$

$$\lambda_1=6500 \text{ cm}^{-1}, \lambda_2=3200 \text{ cm}^{-1}, \Delta G_B=6800 \text{ cm}^{-1}, C=0.18, \Delta G^*=1060 \text{ cm}^{-1}; \Delta G^*_{\text{two-state}}=1170 \text{ cm}^{-1}$$

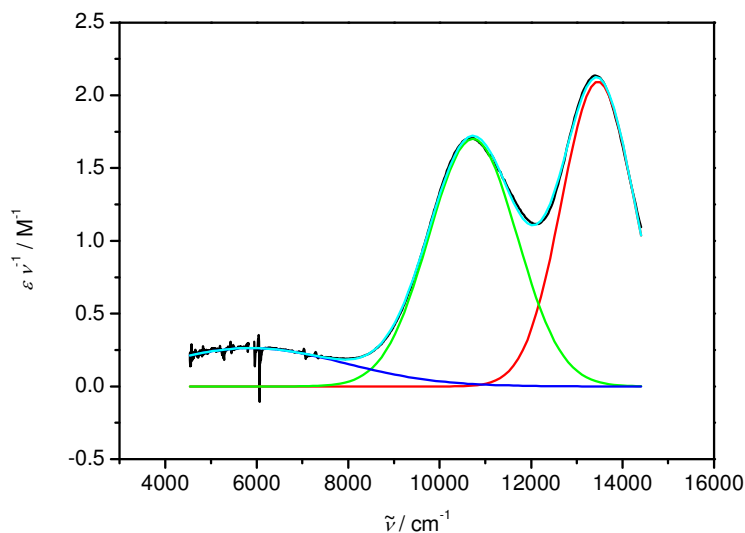

**Figure S1.** Reduced absorption spectrum (black line) of  $\text{II}^+$  in MC and decomposition into three Gaussians and the sum of those (cyan line).

The three-state-GMH-PES fit yields the following parameters for  $\text{IV}^+$

$$\lambda_1=8500 \text{ cm}^{-1}, \lambda_2=4500 \text{ cm}^{-1}, \Delta G_B=5500 \text{ cm}^{-1}, C=0, \Delta G^*=2000 \text{ cm}^{-1}; \Delta G^*_{\text{two-state}}=1730 \text{ cm}^{-1}$$

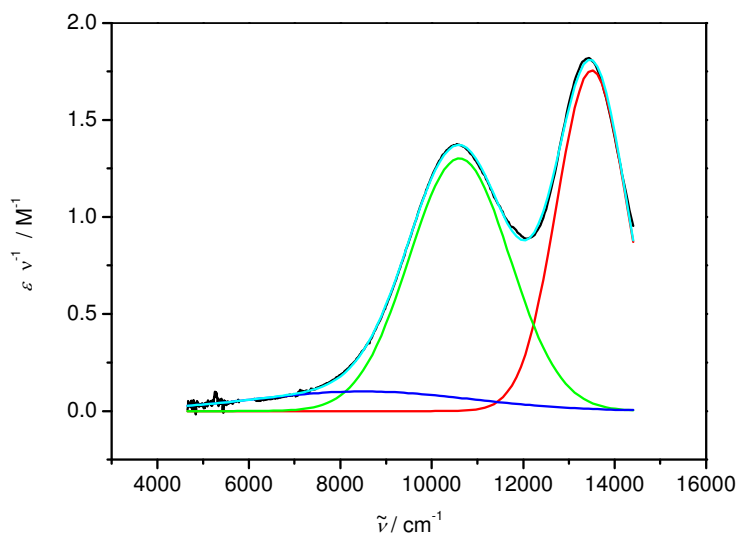

**Figure S2.** Reduced absorption spectrum (black line) of  $\text{IV}^+$  in MC and decomposition into three Gaussians and the sum of those (cyan line).

- (1) Amthor, S.; Lambert, C. *J. Phys. Chem. A* **2006**, *110*, 1177-1189.
- (2) Lambert, C.; Nöll, G. *J. Am. Chem. Soc.* **1999**, *121*, 8434-8442.
- (3) Heckmann, A.; Lambert, C.; Amthor, S. *Chem. Commun.* **2006**, 2959-2961.
- (4) Stewart, J. J. P. *MOPAC97*; Fujitsu Limited, 1997
